# Supplementary material
Source: PubMed Central journal article supplement (PMC9731381)
Supplement: NIHMS1852429-supplement-SI.pdf [file NIHMS1852429-supplement-SI.pdf]

## Supporting Information

### **Modeling noncanonical RNA base pairs by coarse-grained IsRNA2 model**

Dong Zhang<sup>a</sup>, Shi-Jie Chen<sup>b\*</sup>, and Ruhong Zhou<sup>a,\*</sup>

<sup>a</sup> College of Life Sciences and Institute of Quantitative Biology, Zhejiang University, Hangzhou 310058, China

<sup>b</sup> Department of Physics, Department of Biochemistry, and Institute of Data Science and Informatics, University of Missouri, Columbia, Missouri, 65211, USA

## Formulas of energy functions in IsRNA2 model

The energy functions for three local covalent energy terms in the coarse-grained (CG) force field (Eq. 1 in the main text) have the following functional forms:

$$E_{bond}(b) = K_b(b - b_0)^2 + \frac{H_b}{\sqrt{2\pi}\sigma_b} e^{-0.5(b-b_1)^2/\sigma_b^2} \quad (S1)$$

$$E_{angle}(\theta) = K_a(\theta - \theta_0)^2 + \frac{H_a}{\sqrt{2\pi}\sigma_a} e^{-0.5(\theta-\theta_1)^2/\sigma_a^2} \quad (S2)$$

$$E_{torsion}(\phi) = \sum_{n=1}^4 K_n [1 + \cos(n\phi - \phi_n)] \quad (S3)$$

where  $b$ ,  $\theta$  and  $\phi$  denote the bond stretching length between two connected beads, the bond angle between two adjacent bonds, and the torsion angle between three successive bonds, respectively. Parameters  $K_b$ ,  $b_0$ ,  $H_b$ ,  $\sigma_b$ , and  $b_1$  in Eq. S1 describe the strength of bond stretching and the equilibrium bond length. Parameters  $K_a$ ,  $\theta_0$ ,  $H_a$ ,  $\sigma_a$ , and  $\theta_1$  in Eq. S2 characterize the bending energy of the bond angle and the equilibrium bond angle.  $K_n$  and  $\phi_n$  ( $n = 1, 2, 3, 4$ ) in Eq. S3 are related to the local minima on the profile of the torsional energy. Those energy parameters were determined using the iterative simulated reference state approach, and their detailed values are given in Table S1~S3, respectively. Compared to the widely used harmonic potentials for bond stretching and bond angle terms in previous CG models, extra Gaussian terms are introduced in Eqs. S1 and S2 in order to capture more precise details of the statistical potential and to enable broader sampling of the backbone conformations in simulations.

**Table S1** Energy parameters for 21 types of bond stretching energies  $E_{bond}(b)$  in the IsRNA2 force field, in which the last 6 types are for the canonical base pairing (GC, AU, and GU) interactions. The unit for potential energy in the IsRNA2 model is e.u.

| Type  | $K_b$<br>(e.u./Å <sup>2</sup> ) | $b_0$<br>(Å) | $H_b$<br>(e.u.*Å) | $b_1$<br>(Å) | $\sigma_b$<br>(Å) |
|-------|---------------------------------|--------------|-------------------|--------------|-------------------|
| P-S   | 6.508                           | 3.460        | -0.978            | 3.899        | 0.114             |
| S-R1  | 22.753                          | 4.207        | 5.443             | 4.040        | 0.343             |
| S-Y1  | 3.954                           | 4.047        | -0.723            | 3.821        | 0.169             |
| R1-A1 | 173.453                         | 2.964        | -0.172            | 2.983        | 0.031             |
| R1-A2 | 120.572                         | 2.864        | -0.227            | 2.878        | 0.029             |
| R1-G1 | 140.671                         | 2.883        | -0.211            | 2.885        | 0.032             |
| R1-G2 | 95.093                          | 3.560        | -0.250            | 3.569        | 0.035             |
| A1-A2 | 216.486                         | 2.305        | -0.114            | 2.310        | 0.021             |
| G1-G2 | 106.309                         | 3.002        | -0.217            | 3.021        | 0.035             |
| Y1-Y2 | 245.302                         | 2.632        | -0.164            | 2.638        | 0.030             |
| Y1-C1 | 420.063                         | 2.410        | -0.118            | 2.417        | 0.021             |
| Y1-U1 | 632.051                         | 2.437        | -0.061            | 2.440        | 0.018             |
| Y2-C1 | 252.14                          | 2.941        | -0.090            | 2.948        | 0.021             |
| Y2-U1 | 175.06                          | 3.029        | -0.146            | 3.035        | 0.027             |
| S-P   | 5.924                           | 3.391        | -1.028            | 3.888        | 0.132             |
| G1-C1 | 2.025                           | 3.486        | -0.762            | 3.272        | 0.203             |
| G2-Y2 | 2.329                           | 3.599        | -0.981            | 3.361        | 0.229             |
| A1-U1 | 2.054                           | 3.72         | -0.653            | 3.437        | 0.197             |
| A2-Y2 | 3.369                           | 3.678        | -0.283            | 3.532        | 0.201             |
| G1-Y2 | 1.819                           | 3.815        | -3.058            | 3.205        | 0.441             |
| G1-U1 | 0.814                           | 3.817        | -1.201            | 3.875        | 0.36              |

**Table S2** Energy parameters for 16 types of bond angle potentials  $E_{angle}(\theta)$  in the IsRNA2 force field, in which the last 3 types are for canonical base pairing (GC, AU, and GU) interactions. The unit for potential energy in the IsRNA2 model is e.u.

| Type     | $K_a$<br>(e.u./radian <sup>2</sup> ) | $\theta_0$<br>(degree) | $H_a$<br>(e.u.*radian) | $\theta_i$<br>(degree) | $\sigma_a$<br>(radian) |
|----------|--------------------------------------|------------------------|------------------------|------------------------|------------------------|
| P-S-P    | 1.958                                | 120.02                 | -0.504                 | 89.94                  | 0.173                  |
| P-S-R1   | 2.060                                | 115.94                 | -0.634                 | 85.04                  | 0.152                  |
| P-S-Y1   | 2.068                                | 115.28                 | -0.881                 | 73.57                  | 0.171                  |
| S-P-S    | 1.723                                | 119.22                 | -0.227                 | 103.95                 | 0.079                  |
| S-R1-A1  | 17.825                               | 163.44                 | 0.277                  | 153.21                 | 0.092                  |
| S-R1-A2  | 10.579                               | 115.39                 | 3.012                  | 119.92                 | 0.248                  |
| S-R1-G1  | 9.936                                | 164.61                 | 0.973                  | 149.77                 | 0.163                  |
| S-R1-G2  | 2.652                                | 59.30                  | -0.344                 | 127.25                 | 0.093                  |
| S-Y1-Y2  | 3.877                                | 34.92                  | -1.127                 | 96.66                  | 0.160                  |
| S-Y1-C1  | 9.927                                | 153.72                 | 1.695                  | 141.06                 | 0.213                  |
| S-Y1-U1  | 9.983                                | 155.33                 | 1.397                  | 142.38                 | 0.205                  |
| R1-S-P   | 8.012                                | 111.88                 | -0.319                 | 91.53                  | 0.088                  |
| Y1-S-P   | 5.219                                | 117.43                 | -0.310                 | 94.99                  | 0.093                  |
| G2-Y2-C1 | 6.228                                | 91.03                  | -0.183                 | 89.26                  | 0.100                  |
| A2-Y2-U1 | 1.849                                | 70.32                  | -0.434                 | 68.92                  | 0.135                  |
| R1-G1-U1 | 2.891                                | 168.28                 | -0.117                 | 159.75                 | 0.104                  |

**Table S3** Energy parameters for 38 types of torsional angle energies  $E_{torsion}(\phi)$  in the IsRNA2 force field, in which the last 14 types are for canonical base pairing (GC, AU, and GU) interactions. The unit for potential energy in the IsRNA2 model is e.u.

| Type       | $K_1$<br>(e.u.) | $\phi_1$<br>(degree) | $K_2$<br>(e.u.) | $\phi_2$<br>(degree) | $K_3$<br>(e.u.) | $\phi_3$<br>(degree) | $K_4$<br>(e.u.) | $\phi_4$<br>(degree) |
|------------|-----------------|----------------------|-----------------|----------------------|-----------------|----------------------|-----------------|----------------------|
| P-S-P-S    | 0.370           | 45.40                | 0.054           | 10.38                | 0.187           | 92.90                | 0.069           | 30.90                |
| P-S-R1-A1  | -2.166          | -1.89                | 0.876           | -2.38                | -0.108          | 36.12                | -0.220          | 23.19                |
| P-S-R1-A2  | 0.721           | 11.31                | -0.349          | 77.79                | -0.131          | 75.39                | -0.135          | -53.66               |
| P-S-R1-G1  | -0.703          | 32.97                | 0.537           | 12.95                | -0.144          | -6.52                | 0.004           | -18.97               |
| P-S-R1-G2  | 0.594           | -3.96                | 0.590           | -89.18               | 0.290           | -104.95              | -0.289          | -15.71               |
| P-S-Y1-Y2  | 0.523           | -24.58               | -0.573          | 49.92                | 0.091           | -98.30               | 0.173           | 108.37               |
| P-S-Y1-C1  | 0.210           | -57.55               | 0.477           | 12.11                | -0.147          | 57.21                | -0.075          | 1.91                 |
| P-S-Y1-U1  | 0.094           | -27.73               | 0.347           | 8.28                 | -0.097          | 17.29                | -0.076          | 22.17                |
| S-P-S-P    | 0.383           | 20.78                | -0.367          | 17.06                | 0.139           | -39.28               | -0.072          | -20.61               |
| S-P-S-R1   | 0.288           | 0.636                | 0.173           | -63.02               | 0.104           | 42.10                | -0.051          | 15.09                |
| S-P-S-Y1   | -0.109          | -57.63               | 0.188           | -102.03              | 0.146           | 49.74                | 0.137           | 92.82                |
| S-R1-A1-A2 | -0.418          | 49.58                | 0.176           | 31.67                | 0.337           | -57.75               | -0.193          | 95.95                |
| S-R1-G1-G2 | 0.436           | -25.91               | 0.145           | 52.75                | 0.170           | 39.80                | 0.140           | -63.86               |
| S-Y1-C1-Y2 | -1.458          | 15.27                | -0.657          | 38.38                | 0.187           | -47.90               | 0.260           | 17.53                |
| S-Y1-U1-Y2 | -2.135          | 11.53                | 0.751           | -152.89              | 0.309           | 11.87                | -0.465          | -149.58              |
| R1-S-P-S   | 0.186           | 71.39                | 0.080           | -45.30               | 0.156           | 74.49                | 0.072           | 62.60                |
| A1-R1-S-P  | 1.613           | 41.44                | 0.907           | 76.91                | 0.191           | -1.14                | 0.298           | -5.14                |
| A2-R1-S-P  | 0.650           | -88.30               | -0.292          | 95.94                | 0.089           | 96.15                | 0.101           | 28.55                |
| G1-R1-S-P  | 0.093           | -56.96               | 0.136           | -29.09               | 0.371           | 147.25               | -0.176          | 25.71                |
| G2-R1-S-P  | -0.623          | 81.12                | -0.550          | 134.66               | -0.053          | 21.21                | -0.333          | -135.70              |
| Y1-S-P-S   | 0.142           | -36.15               | 0.074           | -20.04               | 0.174           | 37.52                | 0.021           | -3.53                |
| Y2-Y1-S-P  | 0.892           | -112.77              | -0.361          | 98.75                | 0.209           | 108.25               | -0.209          | -25.16               |
| C1-Y1-S-P  | 0.440           | -12.54               | 0.049           | 71.60                | 0.211           | -60.62               | -0.158          | 13.35                |

|             |        |        |        |         |        |        |        |        |
|-------------|--------|--------|--------|---------|--------|--------|--------|--------|
| U1-Y1-S-P   | 0.257  | -0.81  | -0.071 | -6.14   | 0.204  | -28.86 | -0.141 | -43.15 |
| R1-G1-G2-Y2 | 1.605  | 6.61   | 1.376  | -164.81 | 0.761  | 13.55  | -0.587 | -4.77  |
| G1-G2-Y2-C1 | -1.491 | -7.11  | 1.047  | 165.41  | 0.535  | 156.73 | -0.149 | -38.33 |
| G2-Y2-C1-Y1 | 2.180  | 6.10   | 1.238  | -162.66 | 0.600  | 22.93  | -0.095 | 22.42  |
| R1-G1-C1-Y1 | -0.811 | -11.62 | -0.055 | -93.01  | -0.077 | -59.59 | 0.024  | -75.17 |
| R1-G2-Y2-Y1 | 0.760  | -35.36 | -0.837 | 155.48  | 0.056  | -46.76 | 0.275  | 121.88 |
| R1-A1-A2-Y2 | 1.654  | 7.85   | -1.204 | 15.15   | 0.637  | 14.04  | -0.373 | -3.72  |
| A1-A2-Y2-U1 | -1.088 | -3.56  | -0.652 | -7.54   | -0.215 | -14.22 | 0.029  | 29.94  |
| A2-Y2-U1-Y1 | 1.743  | 2.05   | -1.214 | 15.32   | 0.650  | 17.65  | -0.486 | -7.23  |
| R1-A1-U1-Y1 | -0.631 | 2.70   | 0.182  | 6.66    | -0.297 | -23.95 | 0.158  | -15.20 |
| R1-A2-Y2-Y1 | 0.386  | -9.86  | 0.233  | -36.94  | -0.088 | -2.17  | 0.016  | 59.39  |
| R1-G2-G1-Y2 | -1.060 | -11.41 | 0.310  | -55.89  | 0.552  | -5.21  | 0.575  | 150.99 |
| G2-G1-Y2-U1 | 1.155  | 7.14   | 0.237  | -119.78 | -0.876 | 155.18 | 0.164  | 75.47  |
| G1-Y2-U1-Y1 | 1.617  | -5.28  | 1.084  | -170.28 | 0.607  | 15.23  | -0.511 | 4.01   |
| R1-G1-U1-Y1 | 0.941  | -13.70 | 0.212  | -137.28 | 0.163  | 97.70  | -0.181 | 3.23   |

**Table S4** Energy parameters for 66 types of pairwise interactions  $E_{pair}(r)$  in the IsRNA2 force field.

The unit for potential energy in the IsRNA2 model is e.u.

| Type   | $\sigma$<br>(Å) | $D_0$<br>(e.u.) | $\alpha$ (Å <sup>-1</sup> ) | $r_0$ (Å) | $H_1$<br>(e.u.*Å) | $r_1$<br>(Å) | $\sigma_1$ (Å) | $H_2$<br>(e.u.*Å) | $r_2$<br>(Å) | $\sigma_2$ (Å) | $r_{cut}$<br>(Å) |
|--------|-----------------|-----------------|-----------------------------|-----------|-------------------|--------------|----------------|-------------------|--------------|----------------|------------------|
| P--P   | 3.7             | 0.061           | 0.177                       | 13.46     | -0.674            | 5.89         | 0.573          | -0.632            | 9.36         | 2.007          | 13.5             |
| P--S   | 2.7             | 0.317           | 0.483                       | 4.41      | 0.342             | 5.53         | 0.407          | 0.485             | 7.98         | 1.013          | 10.0             |
| P--R1  | 3.5             | 0.001           | 0.314                       | 15.54     | -0.451            | 4.44         | 0.237          | -0.090            | 9.17         | 0.204          | 10.1             |
| P--A1  | 3.4             | 0.261           | 0.573                       | 5.21      | 0.198             | 5.27         | 0.201          | 0.476             | 6.70         | 1.034          | 12.1             |
| P--A2  | 3.6             | 0.001           | 1.174                       | 6.54      | -0.180            | 6.20         | 0.372          | -0.223            | 9.04         | 0.351          | 10.2             |
| P--G1  | 3.3             | 0.697           | 0.679                       | 4.50      | 0.785             | 5.48         | 0.530          | 1.045             | 6.49         | 1.075          | 9.2              |
| P--G2  | 3.1             | 0.829           | 0.861                       | 4.21      | 0.819             | 6.23         | 0.887          | -0.341            | 8.67         | 0.314          | 9.8              |
| P--Y1  | 3.4             | 0.001           | 1.501                       | 6.05      | 0.418             | 6.46         | 0.437          | 0.082             | 8.71         | 0.260          | 9.4              |
| P--Y2  | 3.7             | 0.301           | 1.084                       | 4.46      | 0.569             | 5.65         | 0.729          | -0.144            | 8.76         | 0.168          | 9.4              |
| P--C1  | 3.6             | 0.650           | 0.676                       | 4.76      | 0.627             | 6.12         | 0.526          | 0.056             | 9.03         | 0.233          | 11.5             |
| P--U1  | 3.3             | 0.323           | 1.021                       | 4.64      | -0.777            | 3.99         | 0.363          | -0.174            | 7.71         | 0.445          | 9.0              |
| S--S   | 3.1             | 0.282           | 0.972                       | 4.46      | 0.643             | 5.87         | 0.879          | -0.263            | 6.30         | 0.316          | 8.0              |
| S--R1  | 3.3             | 0.023           | 0.902                       | 5.72      | -1.594            | 3.83         | 0.536          | -0.125            | 7.09         | 0.308          | 8.0              |
| S--A1  | 3.2             | 0.001           | 0.456                       | 9.37      | 0.077             | 5.44         | 0.234          | -0.092            | 6.18         | 0.328          | 7.1              |
| S--A2  | 3.1             | 0.564           | 0.828                       | 4.29      | 0.624             | 4.79         | 0.605          | 0.194             | 7.60         | 0.446          | 8.7              |
| S--G1  | 3.1             | 0.066           | 0.466                       | 6.49      | 0.554             | 5.68         | 0.755          | -0.098            | 7.34         | 0.284          | 10.1             |
| S--G2  | 2.9             | 0.263           | 0.614                       | 4.88      | 0.291             | 7.20         | 0.419          | -0.116            | 8.33         | 0.340          | 9.5              |
| S--Y1  | 3.0             | 0.961           | 0.999                       | 3.84      | -0.467            | 3.88         | 0.330          | 0.048             | 7.31         | 0.237          | 8.9              |
| S--Y2  | 3.1             | 0.071           | 3.699                       | 3.54      | -0.151            | 5.57         | 0.225          | -0.117            | 8.31         | 0.298          | 9.1              |
| S--C1  | 3.3             | 0.011           | 0.293                       | 11.85     | 0.118             | 5.47         | 0.206          | -0.382            | 7.45         | 0.383          | 10.0             |
| S--U1  | 3.1             | 0.001           | 0.672                       | 8.66      | 0.669             | 5.09         | 1.066          | -0.183            | 7.53         | 0.331          | 8.6              |
| R1--R1 | 3.2             | 0.618           | 0.792                       | 4.38      | 0.882             | 5.17         | 0.578          | 0.295             | 6.35         | 0.269          | 9.3              |
| R1--A1 | 2.9             | 0.532           | 1.246                       | 3.63      | 0.527             | 5.94         | 0.472          | 0.302             | 8.84         | 0.588          | 10.7             |
| R1--A2 | 2.9             | 0.514           | 1.265                       | 3.72      | 0.538             | 5.52         | 0.840          | 0.321             | 9.34         | 0.690          | 11.2             |
| R1--G1 | 2.9             | 0.672           | 1.301                       | 3.65      | 0.698             | 4.95         | 1.128          | -0.132            | 6.95         | 0.234          | 8.0              |
| R1--G2 | 2.9             | 0.541           | 1.230                       | 3.68      | 0.391             | 6.09         | 0.460          | -0.355            | 7.37         | 0.443          | 8.6              |
| R1--Y1 | 3.1             | 0.225           | 0.854                       | 4.79      | -0.542            | 3.73         | 0.333          | 0.587             | 5.87         | 0.417          | 8.7              |
| R1--Y2 | 2.9             | 0.105           | 0.626                       | 5.25      | -0.667            | 4.04         | 0.398          | -0.105            | 6.76         | 0.177          | 7.6              |
| R1--C1 | 2.9             | 0.494           | 1.771                       | 3.52      | 0.290             | 6.18         | 0.454          | -0.145            | 6.90         | 0.359          | 8.0              |
| R1--U1 | 3.0             | 0.569           | 0.554                       | 4.45      | 1.240             | 5.73         | 0.761          | 0.283             | 9.14         | 0.507          | 10.4             |
| A1--A1 | 2.5             | 0.846           | 0.467                       | 4.52      | 2.237             | 5.37         | 0.762          | 0.754             | 8.59         | 0.982          | 10.7             |
| A1--A2 | 2.7             | 1.531           | 0.526                       | 4.16      | 3.128             | 5.13         | 1.173          | -0.320            | 6.73         | 0.585          | 11.6             |
| A1--G1 | 2.7             | 0.971           | 1.463                       | 3.40      | 0.999             | 5.45         | 1.088          | -0.831            | 6.69         | 0.557          | 8.3              |
| A1--G2 | 2.7             | 0.484           | 0.699                       | 4.32      | 0.844             | 7.04         | 1.664          | -0.441            | 7.62         | 0.725          | 10.6             |
| A1--Y1 | 2.9             | 0.719           | 1.611                       | 3.51      | 0.340             | 4.98         | 0.605          | 0.103             | 6.48         | 0.208          | 7.1              |
| A1--Y2 | 2.9             | 0.955           | 1.360                       | 3.52      | -0.091            | 5.19         | 0.261          | -0.422            | 7.47         | 0.535          | 9.2              |
| A1--C1 | 2.9             | 0.639           | 1.887                       | 3.40      | 0.824             | 5.88         | 0.734          | -0.517            | 6.73         | 0.355          | 7.8              |
| A1--U1 | 2.6             | 0.980           | 1.198                       | 3.44      | -0.672            | 6.90         | 0.535          | -0.500            | 9.69         | 1.103          | 12.1             |

|        |     |       |       |       |        |      |       |        |      |       |      |
|--------|-----|-------|-------|-------|--------|------|-------|--------|------|-------|------|
| A2--A2 | 2.7 | 0.570 | 1.674 | 3.56  | 0.679  | 5.90 | 0.622 | -0.314 | 7.60 | 0.706 | 9.2  |
| A2--G1 | 2.9 | 0.284 | 1.873 | 3.53  | 0.250  | 5.76 | 0.679 | -0.268 | 6.82 | 0.414 | 8.0  |
| A2--G2 | 2.9 | 0.307 | 1.287 | 3.77  | 0.256  | 5.45 | 0.486 | 0.197  | 9.36 | 0.735 | 11.0 |
| A2--Y1 | 2.9 | 0.414 | 1.318 | 3.80  | 0.779  | 5.73 | 0.547 | 0.553  | 9.25 | 0.642 | 11.1 |
| A2--Y2 | 2.5 | 0.616 | 0.558 | 4.42  | 0.775  | 5.04 | 0.517 | 0.335  | 6.17 | 0.362 | 10.7 |
| A2--C1 | 2.7 | 0.535 | 0.785 | 4.06  | 0.964  | 5.48 | 0.671 | -0.186 | 6.86 | 0.321 | 8.6  |
| A2--U1 | 2.7 | 0.318 | 0.516 | 4.73  | 1.367  | 5.57 | 0.738 | 0.743  | 8.55 | 0.766 | 10.4 |
| G1--G1 | 2.7 | 0.616 | 1.183 | 3.62  | 0.454  | 5.27 | 0.610 | -0.434 | 7.01 | 0.402 | 8.3  |
| G1--G2 | 2.9 | 0.296 | 1.404 | 3.59  | -0.215 | 7.43 | 0.590 | 0.077  | 9.28 | 0.371 | 10.0 |
| G1--Y1 | 2.9 | 0.867 | 1.262 | 3.58  | 0.468  | 4.80 | 0.414 | -0.039 | 7.15 | 0.160 | 7.9  |
| G1--Y2 | 2.9 | 0.437 | 1.165 | 3.40  | 0.247  | 4.63 | 0.671 | -0.046 | 5.81 | 0.256 | 6.9  |
| G1--C1 | 2.9 | 0.639 | 2.164 | 3.34  | 0.449  | 5.03 | 0.407 | -0.326 | 6.74 | 0.268 | 7.8  |
| G1--U1 | 2.7 | 0.516 | 1.251 | 3.62  | 0.683  | 5.03 | 0.614 | -0.382 | 6.83 | 0.482 | 8.4  |
| G2--G2 | 2.7 | 0.220 | 1.011 | 4.11  | 0.191  | 6.56 | 0.280 | 0.153  | 7.93 | 0.231 | 8.8  |
| G2--Y1 | 3.0 | 0.544 | 1.051 | 3.94  | 1.196  | 5.44 | 0.995 | -0.322 | 7.02 | 0.292 | 8.1  |
| G2--Y2 | 2.5 | 0.760 | 0.674 | 3.97  | 0.979  | 5.23 | 0.949 | 0.177  | 9.44 | 0.404 | 10.6 |
| G2--C1 | 2.7 | 0.446 | 0.690 | 4.25  | 0.684  | 5.34 | 0.558 | 0.265  | 8.62 | 0.475 | 10.0 |
| G2--U1 | 2.7 | 0.648 | 0.524 | 4.49  | 1.324  | 5.31 | 0.815 | 0.714  | 7.45 | 1.552 | 10.2 |
| Y1--Y1 | 3.1 | 0.394 | 1.159 | 4.18  | 0.360  | 6.19 | 0.414 | -0.199 | 8.28 | 0.521 | 9.7  |
| Y1--Y2 | 2.7 | 0.012 | 0.286 | 11.02 | -2.363 | 4.17 | 0.799 | 0.268  | 9.48 | 0.519 | 10.8 |
| Y1--C1 | 2.8 | 0.315 | 1.131 | 3.58  | 0.138  | 3.89 | 0.264 | -0.098 | 7.06 | 0.191 | 8.0  |
| Y1--U1 | 3.1 | 0.335 | 1.646 | 3.63  | 0.020  | 6.67 | 0.124 | 0.121  | 9.36 | 0.362 | 10.4 |
| Y2--Y2 | 2.9 | 0.134 | 1.410 | 3.85  | 0.253  | 6.08 | 0.284 | 0.160  | 7.78 | 0.393 | 8.7  |
| Y2--C1 | 2.7 | 0.166 | 0.422 | 5.30  | 0.332  | 6.31 | 0.382 | 0.178  | 9.49 | 0.324 | 10.4 |
| Y2--U1 | 2.7 | 0.190 | 0.810 | 4.58  | -0.406 | 3.10 | 0.260 | 0.428  | 5.78 | 0.733 | 7.6  |
| C1--C1 | 2.5 | 0.422 | 0.751 | 4.16  | 0.988  | 5.23 | 0.738 | -0.317 | 6.82 | 0.401 | 8.6  |
| C1--U1 | 2.9 | 0.121 | 0.531 | 6.63  | -5.777 | 3.03 | 0.614 | 0.326  | 5.79 | 0.288 | 8.6  |
| U1--U1 | 2.7 | 0.805 | 1.376 | 3.50  | 0.519  | 4.85 | 0.444 | -0.288 | 6.95 | 0.383 | 8.1  |
